# Supplementary material for: Increases in tumor markers are associated with primary Sjögren’s syndrome-associated interstitial lung disease
Source: PubMed Central journal article supplement — Ther Adv Chronic Dis. 2020 Jul 30;11:2040622320944802. doi: 10.1177/2040622320944802 (PMC7418474; doi:10.1177/2040622320944802), 2020-07-30
Supplement: supplementary_table_2.pdf [file supplementary_table_2.pdf]

|                 | Male             | Female           | Z     | P      |
|-----------------|------------------|------------------|-------|--------|
| pSS with ILD    | 0.69(0.31, 2.60) | 0.30(0.01, 2.36) | 4.633 | <0.001 |
| pSS without ILD | 0.59(0.30, 5.00) | 0.30(0.30, 9.51) | 5.615 | <0.001 |

|       | CA153       | NSE+CEA+CA125 | NSE         | CEA         | CA125       |
|-------|-------------|---------------|-------------|-------------|-------------|
| AUC   | 0.743       | 0.777         | 0.677       | 0.613       | 0.573       |
| 95%CI | [0.70,0.79] | [0.74,0.82]   | [0.63,0.73] | [0.56,0.66] | [0.52,0.62] |
| Z     |             | 1.118         | 1.982       | 3.904       | 4.991       |
| P     |             | 0.264         | 0.047       | <0.001      | <0.001      |

CA: carbohydrate antigen; NSE: neuron-specific enolase; CEA: carcinoembryonic antigen;  
AUC: Area under ROC curve; CI: confidence intervals.
